# Supplementary material for: Discovery of Specific Inhibitors for Intestinal E. coli β‐Glucuronidase through In Silico Virtual Screening
Source: Hindawi journal article supplement (doi:10.1155/2015/740815), 2015-01-01
Supplement: f1 [file 740815.f1.pdf]

Fifty-nine candidate compounds were acquired from the initial virtually screening which was designed to target the bacterial loop of e $\beta$ G and its active site. The docking energy scores of 59 candidate compounds measured by the DOCK program are -43 to -55 kcal/mol. (Table S1) The candidate compounds were purchased from SPECS (Zoetermeer, The Netherlands). Each candidate was provided as a solid power and dissolved in 100% DMSO (Sigma-Aldrich, MO, USA) to 10 mM as stock. Candidates were screening for their inhibition specificity of e $\beta$ G verse h $\beta$ G, which were conducted at pH 7.3 or pH 5.4 in triplicate, respectively. 40  $\mu$ L purified  $\beta$ G was treated with 10  $\mu$ L compound solution at 37 °C for 30 min, and sequentially incubated with 50  $\mu$ L of pNPG (Sigma-Aldrich) at 37 °C for 30 min. Reactions were quenched with 5  $\mu$ L of 2 N sodium hydroxide (Sigma-Aldrich). Each reaction consisted of 3.75 ng purified  $\beta$ G, 50  $\mu$ M compound, and 5 mM pNPG in PBS containing 10% DMSO and 0.05% BSA (Sigma-Aldrich).  $\beta$ G-activities were measured by color development of pNP detected on a microplate reader at OD 405 nm. Results are displayed as percent of  $\beta$ G activity compared with the untreated control. The result showed that all the 59 candidate compounds displayed selective inhibition against e $\beta$ G activity. Especially, the inhibiting ability against e $\beta$ G activity was >95% in 7 candidates of e $\beta$ G specific inhibitors (Table S1).

**Table S1. The  $\beta$ G activity assay and docking energy score of  $\beta$ G specific inhibitor candidates**

|    | Compound | SPECS ID number | Rank | Docking energy score (kcal/mol) | e $\beta$ G activity (%) with 50 $\mu$ M compound | h $\beta$ G activity (%) with 50 $\mu$ M compound |
|----|----------|-----------------|------|---------------------------------|---------------------------------------------------|---------------------------------------------------|
| 1  | 6368     | AK-968/13146368 | 46   | -50.74                          | 44.87                                             | 116.03                                            |
| 2  | 9183     | AF-399/42309183 | 48   | -50.67                          | 39.67                                             | 107.36                                            |
| 3  | 5259     | AK-968/41025259 | 167  | -48.26                          | 34.05                                             | 106.20                                            |
| 4  | 0136     | AQ-405/42300136 | 289  | -47.43                          | 19.16                                             | 108.76                                            |
| 5  | 3043     | AG-205/10703043 | 316  | -47.30                          | 25.14                                             | 103.55                                            |
| 6  | 1013     | AK-918/12271013 | 343  | -47.16                          | 34.76                                             | 126.45                                            |
| 7  | 3959     | AK-968/40733959 | 428  | -46.75                          | 42.88                                             | 105.45                                            |
| 8  | 2715     | AG-690/13702715 | 606  | -46.11                          | 53.06                                             | 114.38                                            |
| 9  | 9665     | AM-807/42859665 | 1146 | -45.02                          | 8.97                                              | 100.83                                            |
| 10 | 1501     | AK-968/41171501 | 1339 | -44.70                          | 27.85                                             | 105.12                                            |
| 11 | 0956     | AQ-776/42800956 | 2155 | -43.72                          | 29.70                                             | 103.31                                            |
| 12 | 9107     | AG-690/11669107 | 7    | -53.90                          | 29.70                                             | 105.37                                            |
| 13 | 1306     | AK-918/13161306 | 15   | -52.64                          | 29.20                                             | 105.45                                            |
| 14 | 5003     | AK-968/12345003 | 99   | -49.25                          | 17.02                                             | 105.54                                            |
| 15 | 1046     | AF-399/12151046 | 119  | -48.84                          | 45.94                                             | 106.69                                            |
| 16 | 8329     | AF-399/40918329 | 482  | -46.59                          | 33.19                                             | 97.77                                             |
| 17 | 8889     | AN-329/40718889 | 483  | -46.59                          | 11.40                                             | 102.15                                            |
| 18 | 8010     | AG-690/36828010 | 644  | -45.99                          | 23.58                                             | 98.84                                             |
| 19 | 0030     | AO-365/15160030 | 649  | -45.98                          | 58.19                                             | 111.74                                            |
| 20 | 8074     | AG-690/15438074 | 773  | -45.70                          | 22.15                                             | 109.09                                            |
| 21 | 9572     | AQ-750/41789572 | 833  | -45.56                          | 42.66                                             | 106.78                                            |
| 22 | 0523     | AN-068/42800523 | 1142 | -45.03                          | 31.77                                             | 109.26                                            |
| 23 | 7145     | AQ-390/12597145 | 1283 | -44.79                          | 1.00                                              | 119.83                                            |
| 24 | 6843     | AK-968/40946843 | 1369 | -44.66                          | 27.49                                             | 108.76                                            |
| 25 | 8572     | AG-389/41558572 | 1648 | -44.26                          | 17.66                                             | 102.81                                            |
| 26 | 4465     | AQ-390/40194465 | 1935 | -43.95                          | 10.04                                             | 99.50                                             |

|    |       |                 |      |        |       |        |
|----|-------|-----------------|------|--------|-------|--------|
| 27 | 9063  | AG-690/33359063 | 2000 | -43.88 | 32.48 | 105.45 |
| 28 | 3379  | AP-124/43383379 | 2019 | -43.87 | 31.70 | 102.56 |
| 29 | 4043  | AG-205/36564043 | 2027 | -43.86 | 32.98 | 81.24  |
| 30 | 1035  | AK-968/06451035 | 2054 | -43.82 | 25.00 | 102.48 |
| 31 | 3927  | AG-690/12883927 | 2093 | -43.78 | 18.73 | 106.86 |
| 32 | 9274  | AF-399/15599274 | 2158 | -43.72 | 32.34 | 106.69 |
| 33 | 1448  | AP-853/42931448 | 2185 | -43.70 | 11.11 | 109.67 |
| 34 | 7100  | AL-398/12677100 | 2220 | -43.66 | 20.58 | 112.56 |
| 35 | 6019  | AG-690/36516019 | 2239 | -43.64 | 33.83 | 104.96 |
| 36 | 5012  | AE-641/00585012 | 127  | -48.76 | 14.96 | 108.51 |
| 37 | 0015  | AI-204/31730015 | 180  | -48.14 | 17.59 | 108.51 |
| 38 | 1135  | AO-081/15571135 | 201  | -47.95 | 3.70  | 118.10 |
| 39 | 1089  | AJ-292/14921089 | 249  | -47.58 | 47.22 | 119.17 |
| 40 | 0220  | AO-476/43380220 | 518  | -46.43 | 47.15 | 113.55 |
| 41 | 4011  | AE-641/14824011 | 626  | -46.05 | 37.54 | 96.28  |
| 42 | 7670  | AP-263/40917670 | 677  | -45.91 | 43.16 | 93.31  |
| 43 | 2138  | AO-476/40672138 | 947  | -45.37 | 19.23 | 107.27 |
| 44 | 7007  | AN-919/15527007 | 1032 | -45.21 | 44.30 | 105.79 |
| 45 | 5244  | AJ-292/41945244 | 1082 | -45.12 | 26.21 | 44.38  |
| 46 | 4277  | AQ-911/42464277 | 1247 | -44.85 | 44.37 | 115.21 |
| 47 | 5033  | AG-670/36765033 | 1412 | -44.60 | 9.33  | 116.12 |
| 48 | 4021  | AE-848/30744021 | 1441 | -44.55 | 28.56 | 103.06 |
| 49 | 7036  | AF-399/37297036 | 1628 | -44.28 | 6.70  | 95.45  |
| 50 | 3250  | AO-365/42033250 | 1667 | -44.24 | 33.62 | 96.94  |
| 51 | 8013a | AF-407/13078013 | 1718 | -44.17 | 60.40 | 100.33 |
| 52 | 3181  | AR-434/11133181 | 1741 | -44.14 | 30.27 | 88.02  |
| 53 | 8013b | AE-848/33858013 | 1837 | -44.04 | 32.91 | 93.72  |
| 54 | 2074  | AF-407/13462074 | 1868 | -44.01 | 12.46 | 101.07 |
| 55 | 5905  | AJ-292/41685905 | 2048 | -43.83 | 24.93 | 104.96 |
| 56 | 9927  | AN-465/43399927 | 2209 | -43.67 | 25.00 | 113.80 |
| 57 | 6015  | AO-476/14976015 | 2331 | -43.55 | 10.40 | 72.07  |
| 58 | 2020  | AJ-292/42032020 | 2355 | -43.53 | 13.68 | 84.13  |
| 59 | 6003  | AG-690/13506003 | 2365 | -43.52 | 9.76  | 93.06  |
